# Supplementary material
Source: PubMed Central journal article supplement (PMC2748280)
Supplement: NIHMS107713-supplement-Supplementary_Data.pdf [file NIHMS107713-supplement-Supplementary_Data.pdf]

# **Morphometrics Within Dog Breeds Are Highly Reproducible and Dispute Rensch's Rule**

Nathan B. Sutter<sup>1,2</sup>, Dana Mosher<sup>1</sup>, Melissa M. Gray<sup>3</sup> and Elaine A. Ostrander<sup>1,4</sup>

<sup>1</sup> Cancer Genetics Branch, National Human Genome Research Institute, National Institutes of Health, Bethesda MD 20892

<sup>2</sup> Current Address: Department of Clinical Sciences, College of Veterinary Medicine, Cornell University, Ithaca NY 14853

<sup>3</sup> Department of Ecology and Evolutionary Biology, University of California, Los Angeles, Los Angeles, CA 90095

4. To Whom Correspondence May Be Addressed: Elaine A. Ostrander, Ph.D., Cancer Genetics Branch, National Institutes of Health, Building 50, 50 South Drive, Room 5351, Bethesda, MD 20892, USA; Phone: 301-594-5284; FAX 301-480-0462; [eostrand@mail.nih.gov](mailto:eostrand@mail.nih.gov)

Running Title, "Dog Breed Morphometrics"

## Supplementary Text and Figures

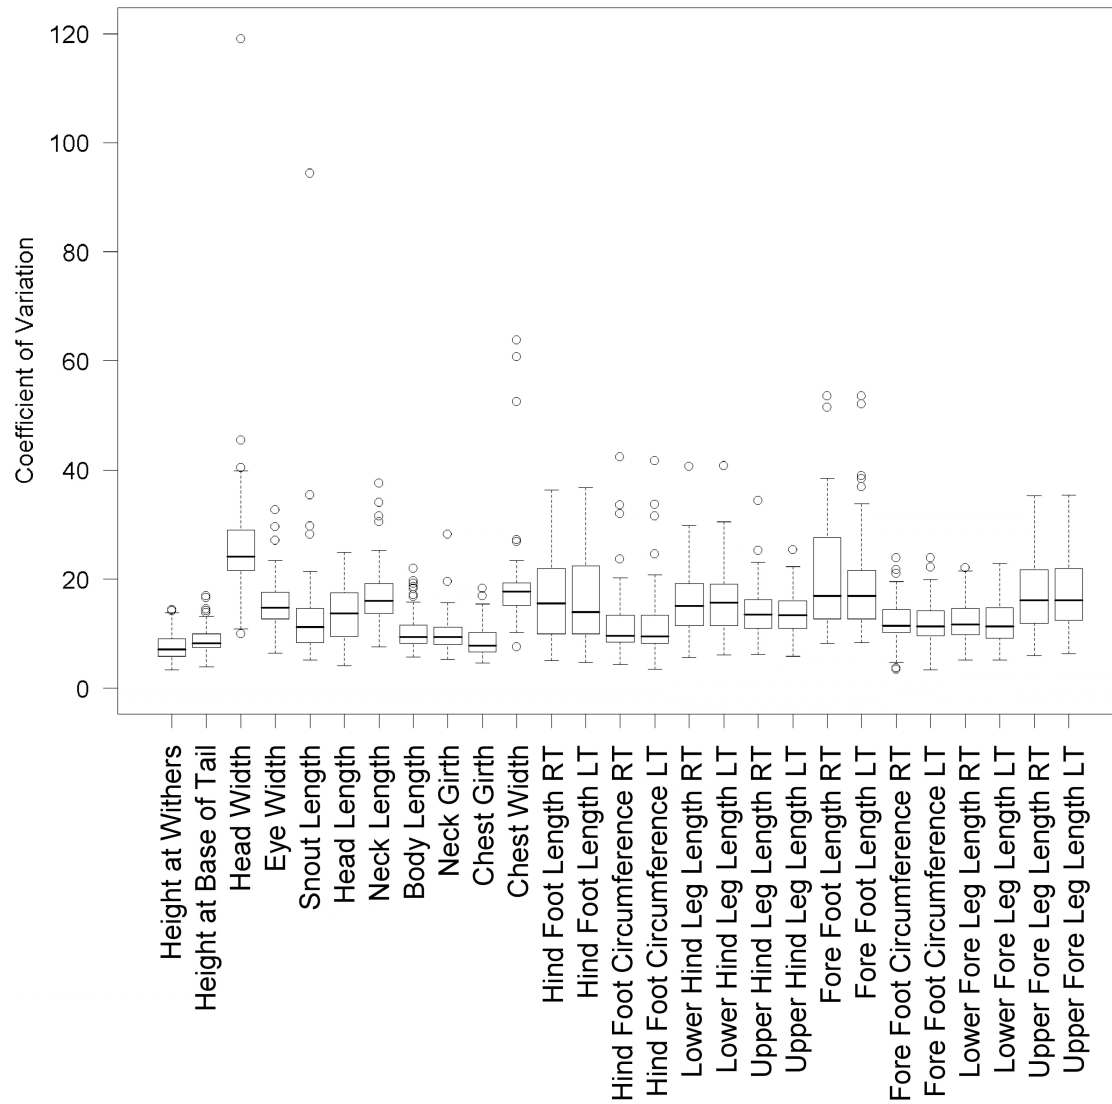

**Supplementary Fig. 1.** Coefficient of variation by breed for each of 27 measurements collected.

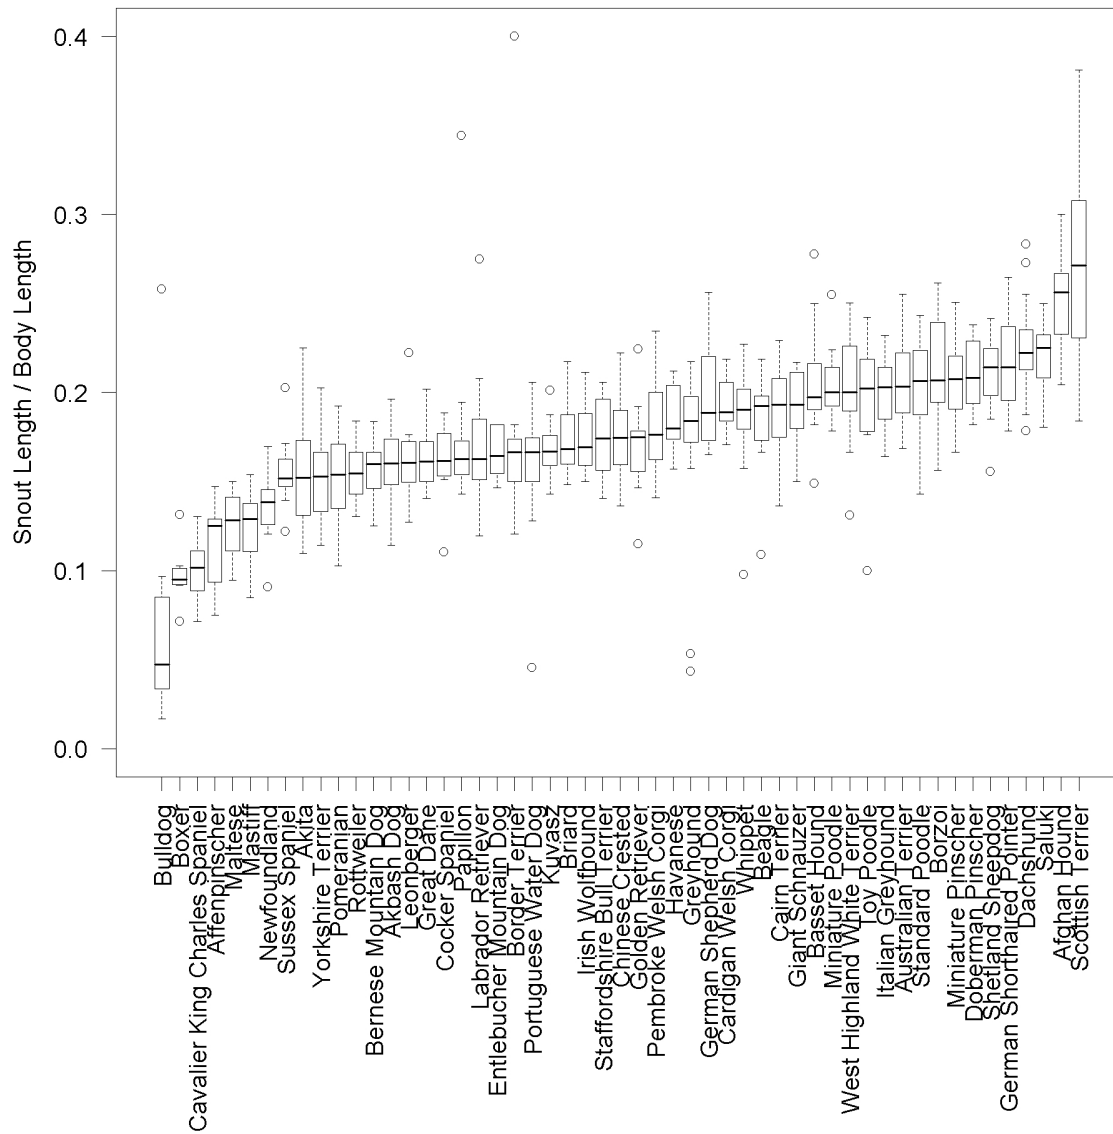

**Supplementary Fig. 2.** Relative snout length, defined as snout length / body length. The 53 breeds with at minimum three male and three female samples are plotted. The box central bar indicates the median, the box ends delimit the 25<sup>th</sup> and 75<sup>th</sup> percentile and the whiskers delimit the most extreme data point within 1.5 times the interquartile range. Outliers are shown as unfilled circles.

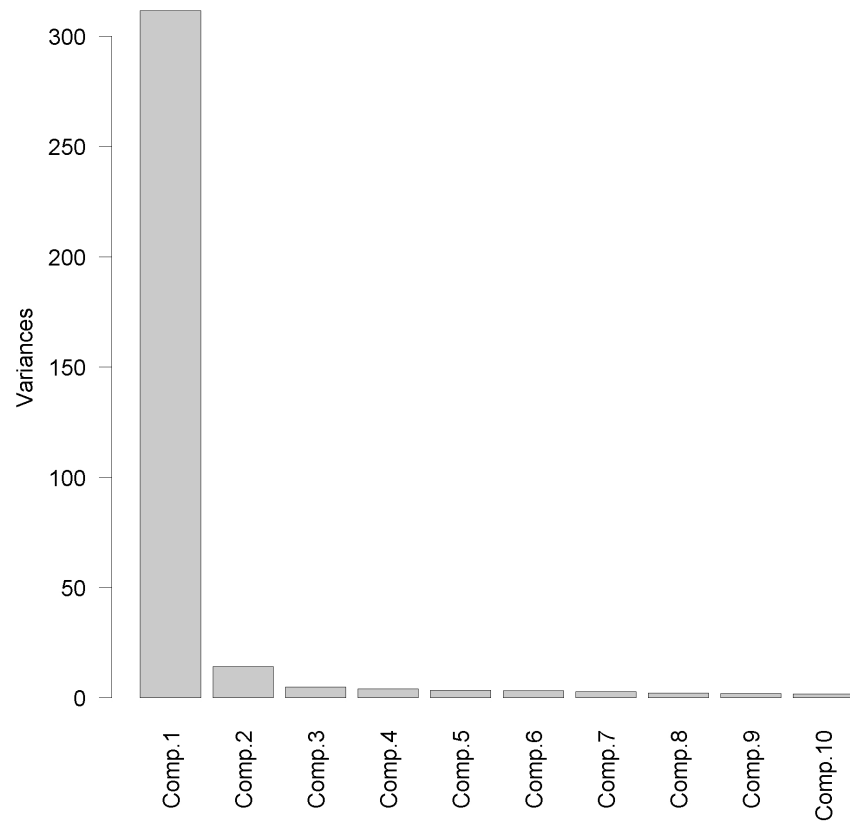

**Supplementary Fig. 3.** Scree plot of variance explained by first 10 principal components from principal component analysis performed on 1155 measured dogs.

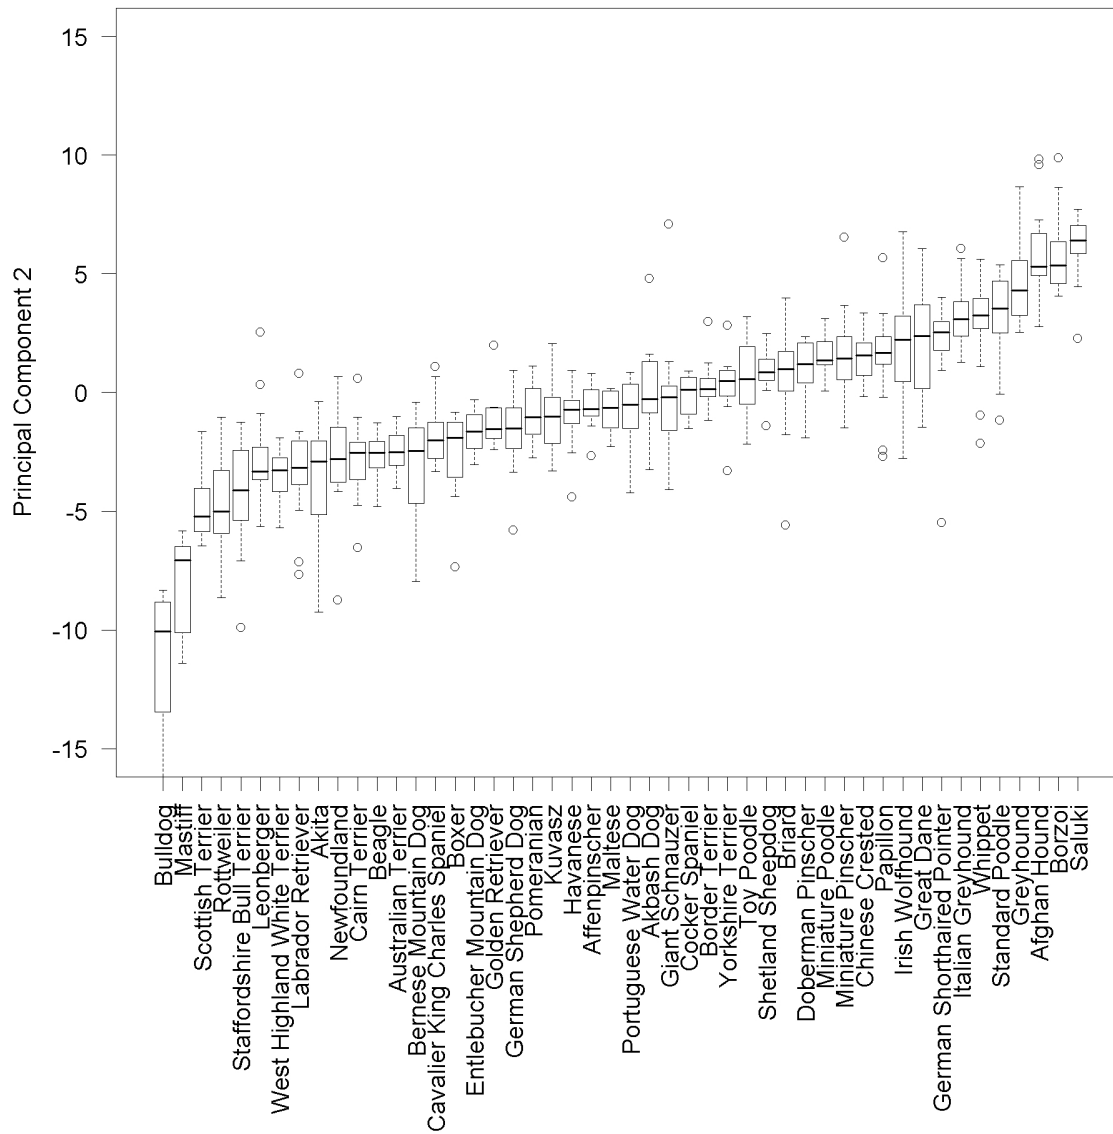

**Supplementary Fig. 4.** Boxplots of each breed's distribution of the second principal component obtained from PCA with the following six achondroplastic breeds removed from the dataset: basset hound, dachshund, Pembroke and Cardigan Welsh corgi, Sussex spaniel, and Dandie Dinmont terrier. Plotting is as for Fig 7.

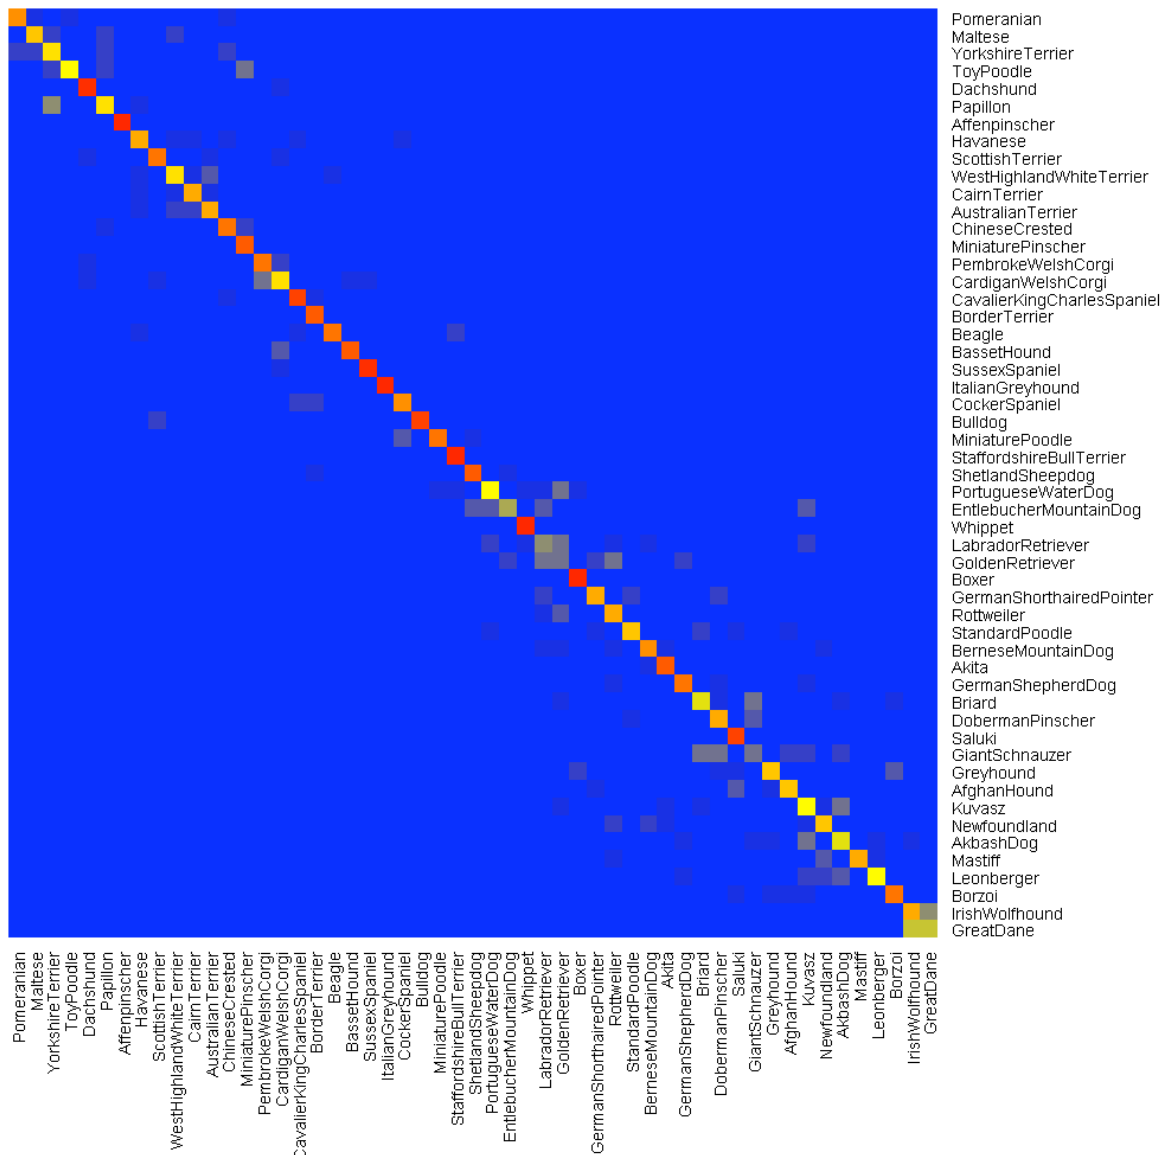

**Supplementary Fig. 5.** Heatmap showing the percentage of dogs classified for each breed with a minimum of three male and three females measured for 19 traits. Actual breed identity is shown on each row while column values indicate the predicted breed membership; correct classification is along the diagonal and mis-classification is off diagonal. The color values range from blue to yellow to red in 5% increments with blue blocks indicating 0% and red blocks indicating 100% classification. The matrix is sorted on the first discriminate function of the breed centroids value which is strongly correlated to height at withers.

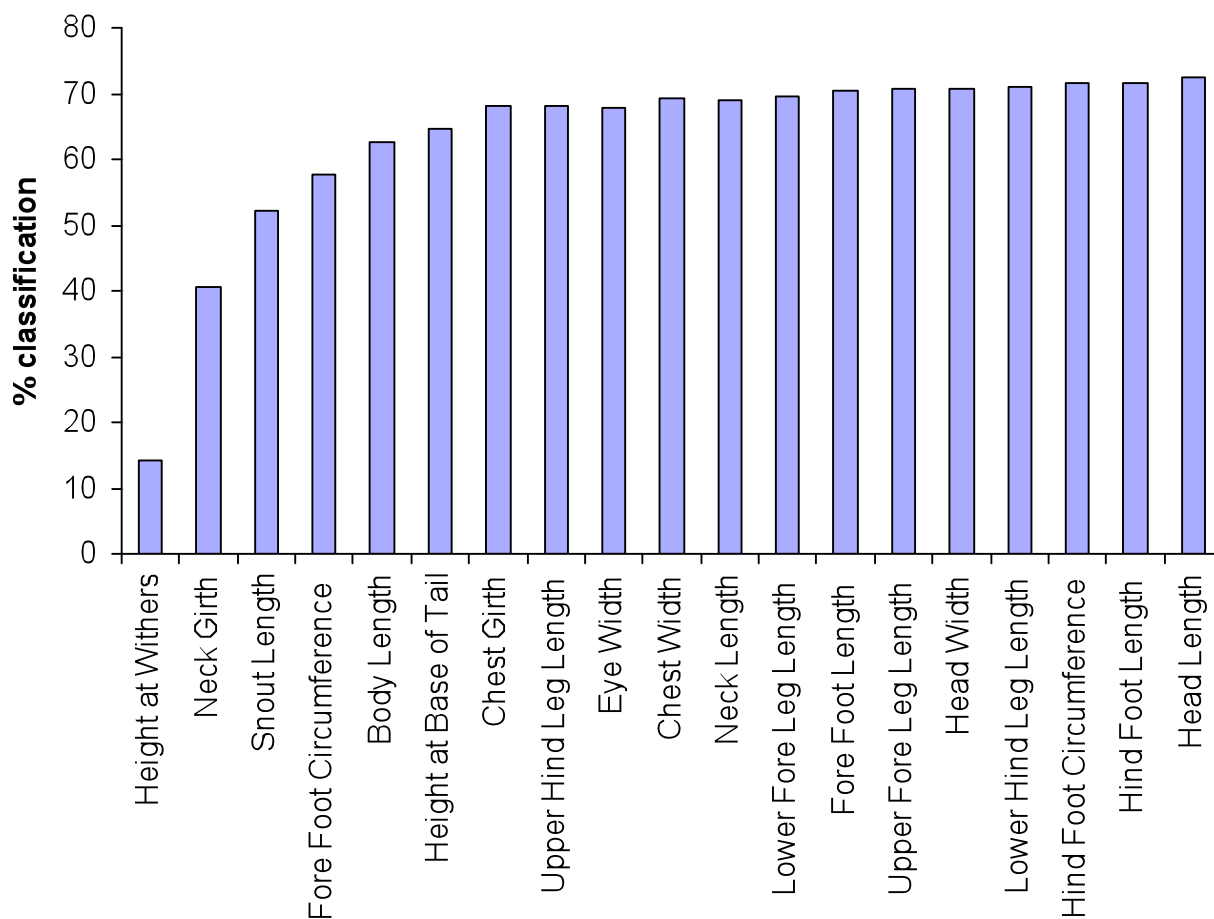

**Supplementary Fig. 6.** The percentage of successful classifications to breed with stepwise introduction of variables into the DFA. The x axis label indicates the variable introduced at that step. For example the second bar from the left is based on the two variables height at withers and neck girth.
